# Supplementary material
Source: HighWire-hosted journal article supplement (https://svn.smart01.highwire.org/content/9/6/613)

sTable 1. Baseline Characteristics of Patients grouped by onset to treatment times and treatments.

|                                     | Onset to Treatment Times |                     |         | Onset to Treatment Times |                      |         | Onset to Treatment Times |                      |         |
|-------------------------------------|--------------------------|---------------------|---------|--------------------------|----------------------|---------|--------------------------|----------------------|---------|
|                                     | 0-90 min                 |                     |         | 91-180 min               |                      |         | 181-270 min              |                      |         |
|                                     | Tenecteplase<br>(N=43)   | Alteplase<br>(N=41) | P value | Tenecteplase<br>(N=310)  | Alteplase<br>(N=312) | P value | Tenecteplase<br>(N=354)  | Alteplase<br>(N=352) | P value |
| Mean Age -yr                        | 61.6±11.3                | 63.2±9.3            | 0.39    | 66.0±11.7                | 64.3±11.3            | 0.03    | 65.5±11.2                | 65.6±11.3            | 0.88    |
| Age group -yr                       |                          |                     | 0.16    |                          |                      | 0.13    |                          |                      | 0.65    |
| 18-59                               | 19 (44.2)                | 15 (36.6)           |         | 88 (28.4)                | 108 (34.6)           |         | 104 (29.4)               | 93 (26.4)            |         |
| 60-79                               | 21 (48.8)                | 26 (63.4)           |         | 184 (59.4)               | 177 (56.7)           |         | 215 (60.7)               | 225 (63.9)           |         |
| ≥80                                 | 3 (7.0)                  | 0 (0.0)             |         | 38 (12.3)                | 27 (8.7)             |         | 35 (9.9)                 | 34 (9.7)             |         |
| Male Sex - no. (%)                  | 31 (72.1)                | 28 (68.3)           | 0.70    | 208 (67.1)               | 212 (67.9)           | 0.82    | 251 (70.9)               | 237 (67.3)           | 0.30    |
| Weight (IQR) - kg                   | 62(54-68)                | 68.3(60-76)         | 0.72    | 66(57.5-75)              | 68.0(60-75)          | 0.04    | 65(58.7-75)              | 65.0(58-75.5)        | 0.61    |
| Medical history- no. (%)            |                          |                     |         |                          |                      |         |                          |                      |         |
| Hypertension                        | 32 (74.4)                | 31 (75.6)           | 0.90    | 213 (68.7)               | 225 (72.1)           | 0.25    | 262 (74.0)               | 255 (72.4)           | 0.64    |
| Diabetes mellitus                   | 11 (25.6)                | 12 (29.3)           | 0.70    | 74 (23.9)                | 92 (29.5)            | 0.11    | 85 (24.0)                | 103 (29.3)           | 0.11    |
| Hyperlipidemia                      | 8 (18.6)                 | 9 (22.0)            | 0.70    | 59 (19.0)                | 79 (25.3)            | 0.06    | 61 (17.2)                | 71 (20.2)            | 0.32    |
| Coronary heart disease              | 7 (16.3)                 | 10 (24.4)           | 0.36    | 84 (27.1)                | 72 (23.1)            | 0.25    | 74 (20.9)                | 84 (23.9)            | 0.35    |
| Arrhythmia                          | 4 (9.3)                  | 6 (14.6)            | 0.52    | 68 (21.9)                | 71 (22.8)            | 0.81    | 63 (17.8)                | 69 (19.6)            | 0.54    |
| Current smoking - no. (%)           | 17 (39.5)                | 18 (43.9)           | 0.90    | 111 (35.9)               | 117 (37.5)           | 0.89    | 137 (38.7)               | 139 (39.6)           | 0.97    |
| History of medication use - no. (%) |                          |                     |         |                          |                      |         |                          |                      |         |
| Antiplatelet agents                 | 6 (14.0)                 | 4 (9.8)             | 0.74    | 40 (12.9)                | 42 (13.5)            | 0.84    | 44 (12.4)                | 46 (13.1)            | 0.80    |
| Anticoagulant agents                | 1 (2.3)                  | 0 (0.0)             | >0.99   | 0 (0.0)                  | 2 (0.6)              | 0.50    | 4 (1.1)                  | 5 (1.4)              | 0.75    |

|                                  |           |           |       |              |                |      |                |              |       |
|----------------------------------|-----------|-----------|-------|--------------|----------------|------|----------------|--------------|-------|
| Antihypertensive drugs           | 21 (48.8) | 20 (48.8) | >0.99 | 118 (38.1)   | 138 (44.2)     | 0.12 | 157 (44.4)     | 160 (45.5)   | 0.77  |
| Hypoglycemic drugs               | 6 (14.0)  | 5 (12.2)  | 0.81  | 53 (17.1)    | 56 (17.9)      | 0.78 | 47 (13.3)      | 57 (16.2)    | 0.27  |
| Lipid-lowering drugs             | 6 (14.0)  | 4 (9.8)   | 0.74  | 27 (8.7)     | 26 (8.3)       | 0.87 | 34 (9.6)       | 30 (8.5)     | 0.62  |
| Pre-stroke mRS - no. (%)         |           |           | 0.48  |              |                | 0.25 |                |              | 0.54  |
| 0                                | 40 (93.0) | 36 (87.8) |       | 278 (89.7)   | 288 (92.3)     |      | 314 (88.7)     | 307 (87.2)   |       |
| 1                                | 3 (7.0)   | 5 (12.2)  |       | 32 (10.3)    | 24 (7.7)       |      | 40 (11.3)      | 45 (12.8)    |       |
| NIHSS score*                     |           |           |       |              |                |      |                |              |       |
| Median (IQR)                     | 7(6-10)   | 9(6-11)   | 0.14  | 7(5-10)      | 7(6-10)        | 0.47 | 7(5-10)        | 7(6-10)      | 0.23  |
| Mild (≤7)                        | 23 (53.5) | 14 (34.1) | 0.21  | 171 (55.2)   | 169 (54.2)     | 0.67 | 224 (63.3)     | 203 (57.7)   | 0.28  |
| Moderate (8-14)                  | 18 (41.9) | 25 (61.0) |       | 108 (34.8)   | 117 (37.5)     |      | 100 (28.2)     | 118 (33.5)   |       |
| Severe (≥15)                     | 2 (4.7)   | 2 (4.9)   |       | 31 (10.0)    | 26 (8.3)       |      | 30 (8.5)       | 31 (8.8)     |       |
| Onset-to-needle time (IQR) - min | 75(60-85) | 75(66-82) | 0.73  | 140(118-161) | 140(116.5-161) | 0.79 | 221.5(200-245) | 230(209-250) | 0.005 |
| Door-to-needle time -min         | 45(39-55) | 48(40-57) | 0.44  | 55(45-71)    | 60(48-78)      | 0.02 | 63.5(45-88)    | 65(49-91)    | 0.19  |
| Bridging thrombectomy            | 2 (4.7)   | 5 (12.2)  | 0.26  | 13 (4.2)     | 11 (3.5)       | 0.67 | 12 (3.4)       | 7 (2.0)      | 0.25  |

IQR denotes interquartile range.

\* National Institutes of Health Stroke Scale (NIHSS) scores range from 0 to 42, with higher scores indicating more severe stroke.

**sFigure 1. Enrollment and Randomization**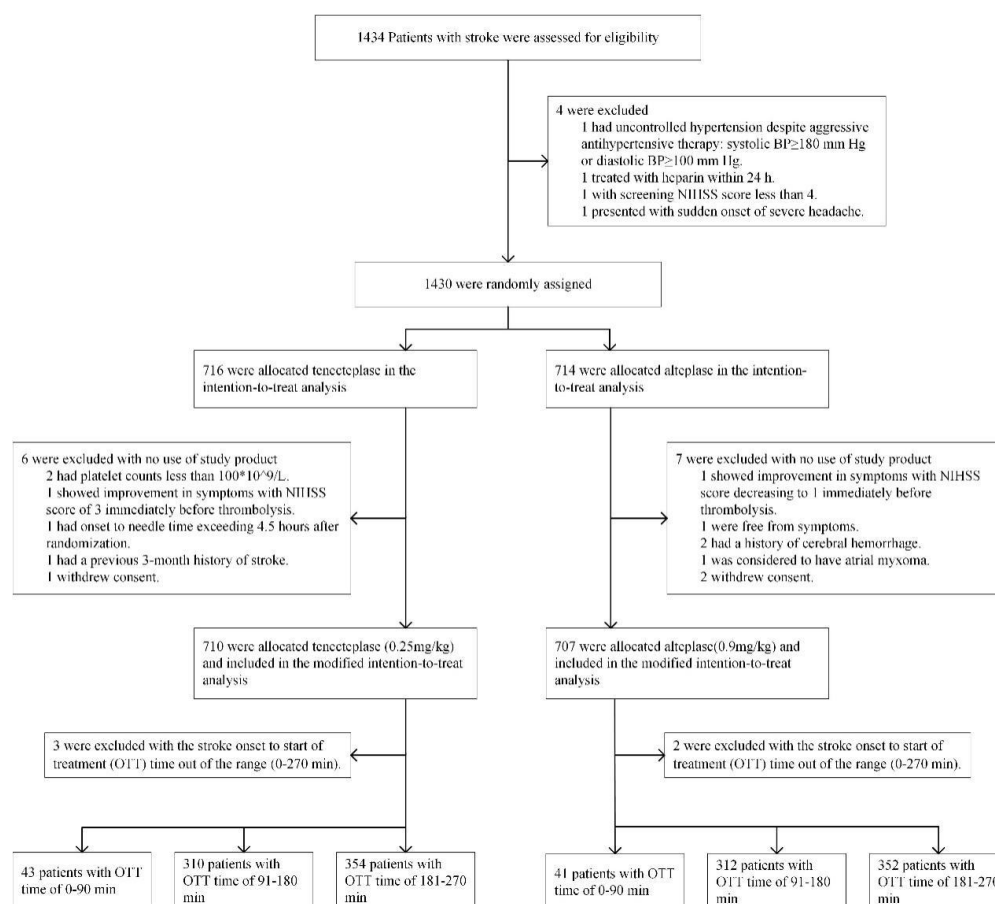

Supplement: inline-supplementary-material-2 [file inline-supplementary-material-2.pdf]
